# Supplementary material
Source: PubMed Central journal article supplement (PMC5823028)
Supplement: NIHMS941995-supplement-Supplemental_file_1.pdf [file NIHMS941995-supplement-Supplemental_file_1.pdf]

Nathan A. Bernhardt\* and Ulrich H. E. Hansmann\*

*Dept. of Chemistry & Biochemistry, University of Oklahoma, Norman, OK 73019, USA*

E-mail: [nbernhardt@ou.edu](mailto:nbernhardt@ou.edu); [uhansmann@ou.edu](mailto:uhansmann@ou.edu)

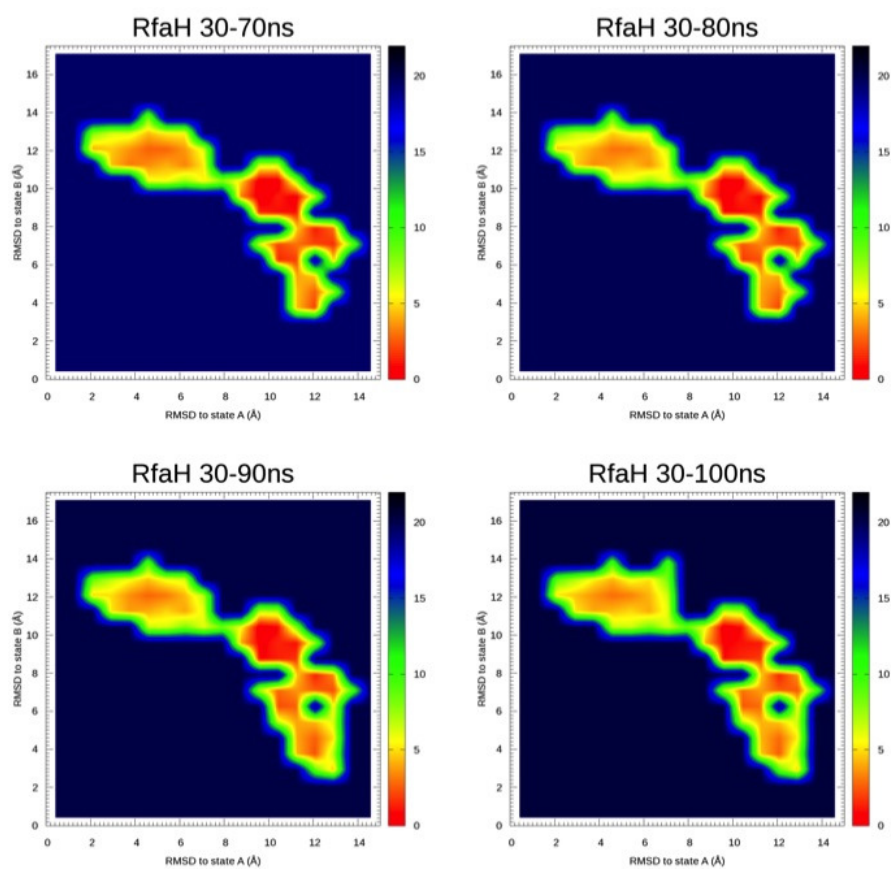

Figure S1: Free energy landscape projected onto the RMSD relative to the ideal bound and unbound state. Each plot uses a different amount of simulation time.

**Table S1: Average exchange rate between a simulation with the lambda value shown and its neighbor with the lambda value beneath.**

| $\lambda$ ( $\text{kJ}/\text{nm}^2$ ) | Ex-rate (%) Bound Side | Ex-rate (%) Unbound Side |
|---------------------------------------|------------------------|--------------------------|
| 0.4                                   | 31                     | 22                       |
| 0.2                                   | 29                     | 19                       |
| 0.1                                   | 29                     | 28                       |
| 0.075                                 | 29                     | 29                       |
| 0.055                                 | 27                     | 24                       |
| 0.035                                 | 28                     | 27                       |
| 0.028                                 | 28                     | 26                       |
| 0.023                                 | 23                     | 26                       |
| 0.015                                 | 24                     | 25                       |
| 0.010                                 | 26                     | 25                       |
| 0.005                                 | 25                     | 25                       |
| 0.0                                   | 0                      | 0                        |
| 0.0 (hb)                              | —                      | —                        |
